# Supplementary material for: Unresolved Subclinical Hypothyroidism is Independently Associated with Progression of Chronic Kidney Disease
Source: PubMed Central journal article supplement — Int J Med Sci. 2013 Dec 20;11(1):52–9. doi: 10.7150/ijms.7186 (PMC3880991; doi:10.7150/ijms.7186), 2013-12-20
Supplement: ijmsv11p0052s1.pdf [file ijmsv11p0052s1.pdf]

## Supplementary Material

**Table S1.** Comparison of EF and LV mass index between CKD patients with different thyroid status

| Echocardiographic parameters      | Unresolved subclinical hypothyroidism (n = 10) | Resolved subclinical hypothyroidism (n = 13) | Euthyroid (n = 54) | p     |
|-----------------------------------|------------------------------------------------|----------------------------------------------|--------------------|-------|
| EF (%)                            | 61.9 ± 14.9                                    | 63.6 ± 9.6                                   | 65.9 ± 10.9        | 0.619 |
| LV mass index (g/m <sup>2</sup> ) | 87.2 ± 40.6                                    | 119.7 ± 31.4                                 | 144.6 ± 280.0      | 0.748 |

\*The results of EF and LV mass index were known in 77 (45.8 %) of the 168 patients.

Abbreviations: EF, ejection fraction; LV, left ventricular.

**Table S2.** Comparison of the slope of eGFR decline between CKD patients with different thyroid status according to baseline proteinuria amount

|                                                  | Unresolved subclinical hypothyroidism | Resolved subclinical hypothyroidism | Euthyroid   | p     |
|--------------------------------------------------|---------------------------------------|-------------------------------------|-------------|-------|
| Proteinuria < 0.3 g/day                          |                                       |                                     |             |       |
| Number of patients (%)                           | 6 (30.0)                              | 7 (33.3)                            | 58 (45.7)   | 0.283 |
| eGFR decline/yr (ml/min/1.73 m <sup>2</sup> /yr) | -12.3 ± 7.7 <sup>*,†</sup>            | -3.4 ± 3.1                          | -4.00 ± 3.8 | 0.035 |
| Proteinuria 0.3-3 g/day                          |                                       |                                     |             |       |
| Number of patients (%)                           | 9 (45.0)                              | 8 (38.1 %)                          | 50 (39.4)   | 0.878 |
| eGFR decline/yr (ml/min/1.73 m <sup>2</sup> /yr) | -5.5 ± 4.1                            | -6.3 ± 7.1                          | -5.96 ± 6.2 | 0.988 |
| Proteinuria > 3 g/day                            |                                       |                                     |             |       |
| Number of patients (%)                           | 5 (25.0)                              | 6 (28.6)                            | 19 (15.0)   | 0.207 |
| eGFR decline/yr (ml/min/1.73 m <sup>2</sup> /yr) | -19.4 ± 23.3                          | -5.3 ± 3.7                          | -8.5 ± 6.4  | 0.415 |

\* p < 0.05 vs. euthyroid, † p < 0.05 vs. resolved subclinical hypothyroidism.
